# Supplementary material
Source: HighWire-hosted journal article supplement (https://www.jrheum.org/highwire/filestream/31195/field_highwire_adjunct_files/0/2016-0904.C1.pdf)
Supplement: 2016-0904.C1.pdf [file 2016-0904.C1.pdf]

## **Correction**

### **Updating the Psoriatic Arthritis (PsA) Core Domain Set: A Report from the PsA Workshop at OMERACT 2016\***

Orbai AM, de Wit M, Mease PJ, Callis Duffin K, Elmamoun M, Tillett W, et al. Updating the psoriatic arthritis (PsA) core domain set: a report from the PsA workshop at OMERACT 2016. J Rheumatol 2017; doi:10.3899/jrheum.160904. In Table 2, some data are incorrect in the rows for France, USA, and Total. In the first data column, the number for France should be 12, the number for USA should be 27, and the number for the Total should be 129.

\*This correction is to the First Release version only, published online February 1, 2017.

doi:10.3899/jrheum.160904.C1
